# Supplementary material for: Regulatory control and impulsivity relate to resting frontal activity
Source: PubMed Central journal article supplement — Soc Cogn Affect Neurosci. 2017 Jun 26;12(9):1377–83. doi: 10.1093/scan/nsx080 (PMC5737534; doi:10.1093/scan/nsx080), 2017-06-26
Supplement: nsx080_supp_scan-17-114.pdf [file nsx080_supp_scan-17-114.pdf]

Supplementary Table 1.

*Carver and White's BIS Items by Subscale from Heym, Ferguson, & Lawrence (2008).*

| Items                                                                                      | Subscale    |
|--------------------------------------------------------------------------------------------|-------------|
| 1. Even if something bad is about to happen to me I rarely experience fear or nervousness. | FFFS-Fear   |
| 2. Criticism or scolding hurts me quite a bit.                                             | BIS-Anxiety |
| 3. I feel pretty worried or upset when I think or know somebody is angry at me.            | BIS-Anxiety |
| 4. If I think something unpleasant is going to happen I usually get pretty worked up       | FFFS-Fear   |
| 5. I feel worried when I think I have done poorly at something important.                  | BIS-Anxiety |
| 6. I have very few fears compared to my friends.                                           | FFFS-Fear   |
| 7. I worry about making mistakes.                                                          | BIS-Anxiety |
